# Supplementary material for: Production of Polyclonal Antibodies and Development of Competitive ELISA for Quantification of the Lantibiotic Paenibacillin
Source: MDPI journal article supplement (doi:10.3390/fermentation10050232), 2024-04-26
Supplement: s1 [file s1]

## Supplementary file S1

### 1. Comparison of competitive paenibacillin ELISA to conventional assay

**Supplementary Tabel S1:** Comparison of the paenibacillin competitive ELISA and conventional bioassay for paenibacillin detection:

| Assay criteria                      | Competitive ELISA                                                                                                                                                                                                                                                                                                                                                                              | Conventional bioassay                                                                                                                                                                                                                                                                                                                                                     |
|-------------------------------------|------------------------------------------------------------------------------------------------------------------------------------------------------------------------------------------------------------------------------------------------------------------------------------------------------------------------------------------------------------------------------------------------|---------------------------------------------------------------------------------------------------------------------------------------------------------------------------------------------------------------------------------------------------------------------------------------------------------------------------------------------------------------------------|
| Limit of detection of paenibacillin | 15.6 ng/mL                                                                                                                                                                                                                                                                                                                                                                                     | 20 µg/mL                                                                                                                                                                                                                                                                                                                                                                  |
| Specificity                         | Highly specific (antibody-based)                                                                                                                                                                                                                                                                                                                                                               | cannot discriminate between co-produced antimicrobials                                                                                                                                                                                                                                                                                                                    |
| Detection agents                    | Specific polyclonal antibodies                                                                                                                                                                                                                                                                                                                                                                 | Indicator bacterial strain                                                                                                                                                                                                                                                                                                                                                |
| Repeatability                       | Repeatable due to low coefficient of variation among samples                                                                                                                                                                                                                                                                                                                                   | Variable with the physiological status of the indicator strain                                                                                                                                                                                                                                                                                                            |
| Sensitivity                         | Sensitive to low paenibacillin levels (nanograms)                                                                                                                                                                                                                                                                                                                                              | Detect paenibacillin at microgram levels                                                                                                                                                                                                                                                                                                                                  |
| Recovery from different matrices    | 78-91%                                                                                                                                                                                                                                                                                                                                                                                         | Prone to interference by media composition (e.g., acids).                                                                                                                                                                                                                                                                                                                 |
| Advantages                          | <ul style="list-style-type: none"> <li>• Paenibacillin detection occurs in a timely manner.</li> <li>• Facilitates discovery of paenibacillin or similar peptides using the specific polyclonal antibodies generated.</li> <li>• Enables investigation of peptide biosynthesis and localization inside the cell.</li> <li>• Accurate quantification of paenibacillin at low levels.</li> </ul> | <ul style="list-style-type: none"> <li>• confirms the presence of antimicrobial compounds in the tested preparations.</li> </ul>                                                                                                                                                                                                                                          |
| Disadvantages                       | <ul style="list-style-type: none"> <li>• The assay development is expensive and resource intensive.</li> </ul>                                                                                                                                                                                                                                                                                 | <ul style="list-style-type: none"> <li>• Assay results vary with the growth status of the indicator strain.</li> <li>• Selection of the indicator strains is a laborious process.</li> <li>• Th assay completion is time consuming.</li> <li>• Assay interpretation can be confounded by the presence of multiple antimicrobial compounds in the test samples.</li> </ul> |

**2. Paenibacillin purity check using HPLC using area under the curve and excluding blank-related peaks and confirming the peptide molecular mass using MALDI-TOF.**

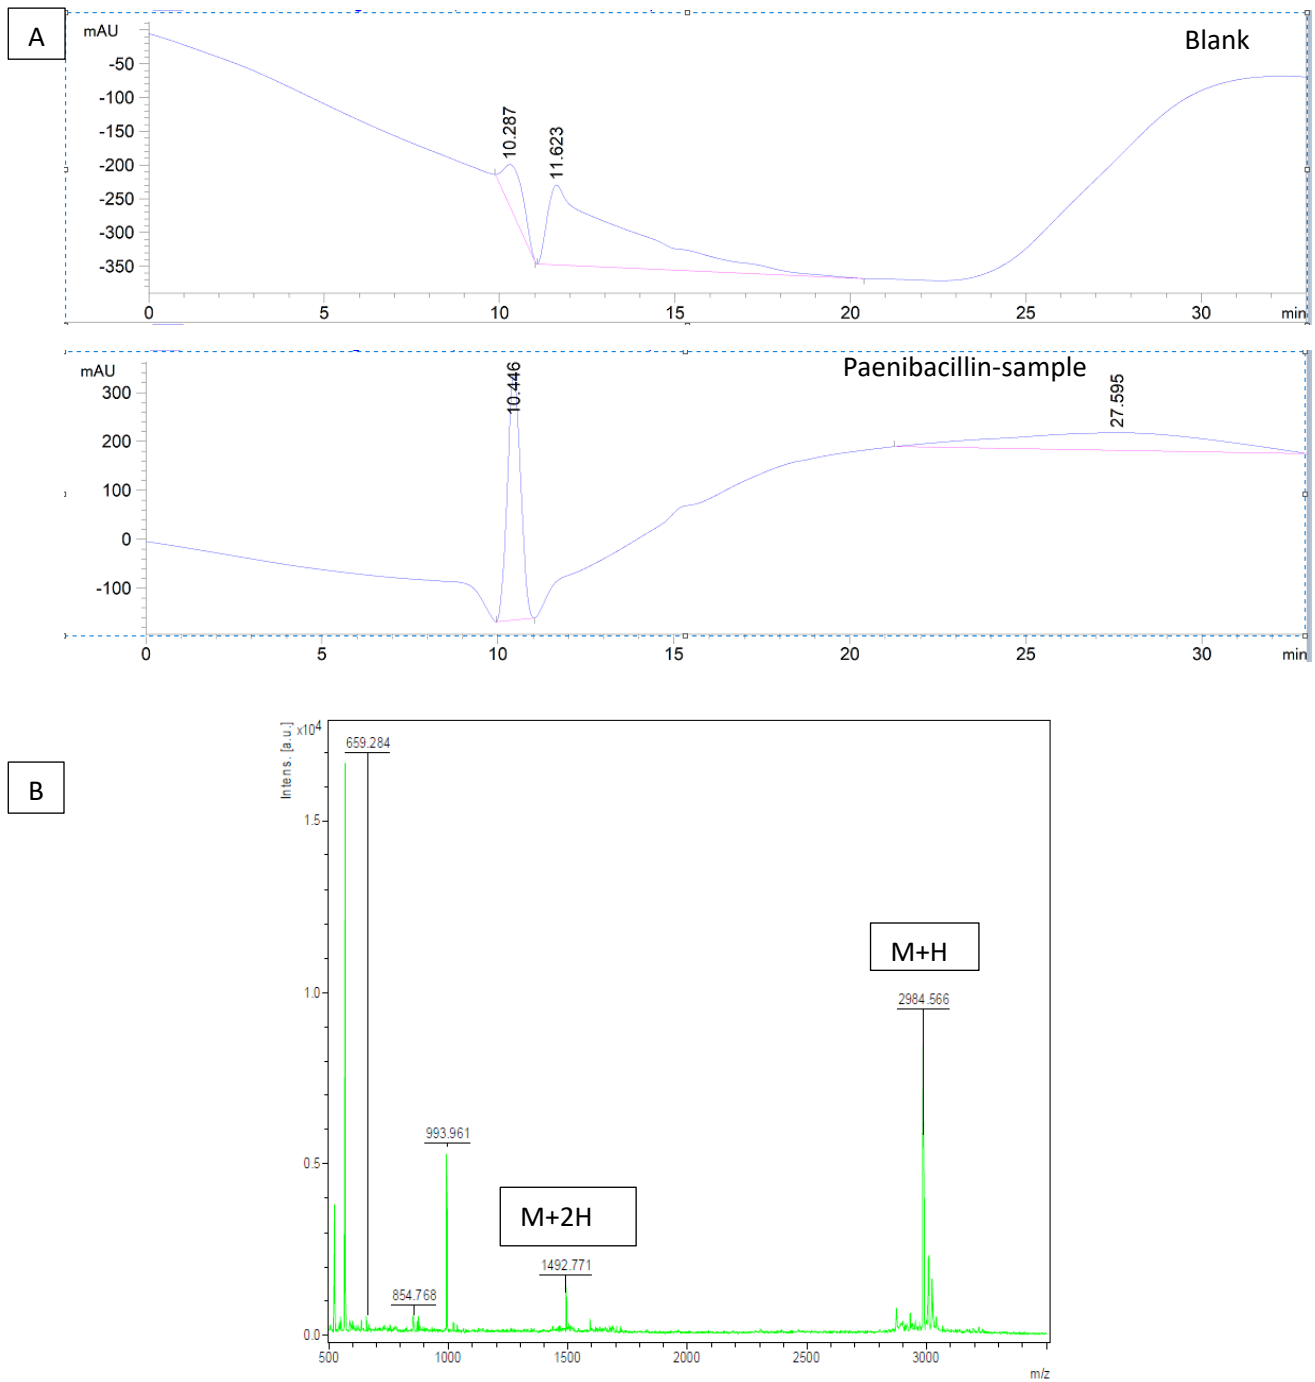

**Supplementary Figure S1.** HPLC chromatograph (A) and MALDI-TOF analysis (B) for molecular mass confirmation of purified paenibacillin used for rabbit immunization.

### 3. ELISA specificity

The competitive ELISA has been conducted as detailed in the manuscript. Different antimicrobial peptides at the defined concentrations shown below were mixed with the anti-paenibacillin pAbs and incubated for one hour at 37°C. Anti-paenibacillin pAbs were mixed with water instead for the positive control. Portions of the mixture were added to pre-coated and blocked wells and the bound anti-paenibacillin pAbs were measured by adding goat anti-rabbit IgG-HRP and the signals were measured at 450 nm as described in the manuscript.

**Supplementary Table S2:** Reactivity of different antimicrobial peptides with anti-paenibacillin polyclonal antibodies as determined by the competitive ELISA.

| Samples mixed with the polyclonal antibodies       | OD <sub>450</sub> |
|----------------------------------------------------|-------------------|
| Antimicrobial-free control (Water)                 | 0.309 ±0.038      |
| Nisin (500 IU/mL)                                  | 0.263±0.004       |
| Vancomycin (4 µg/mL)                               | 0.242±0.004       |
| Polymyxin (16 µg/mL)                               | 0.268±0.005       |
| Blank (No polyclonal antibodies nor paenibacillin) | 0.053±0.001       |

## Supplementary file S2

### 1. Primer sequences in the current study

Primer sequences, designed in this study, for paenibacillin biosynthetic genes used for the Real-Time PCR in the current study. The paenibacillin biosynthetic gene cluster (GenBank accession: JQ728481.1) from *Paenibacillus polymyxa* OSY-DF was used to design the primers using NCBI primer BLAST (<https://www.ncbi.nlm.nih.gov/tools/primer-blast/>; accessed on 10 August 2020).

| Paenibacillin biosynthetic genes | Gene function               | Primer sequences (5'-3')                             | PCR products (bp) |
|----------------------------------|-----------------------------|------------------------------------------------------|-------------------|
| <i>paeA</i>                      | Paenibacillin prepropeptide | F: GCTATGAGGCCAGTGAGCTT<br>R: TGGAACAAGAACCGGTACAGA  | 111               |
| <i>paeP</i>                      | Peptidase                   | F: CGATTACGTCGGGCATGGTA<br>R: CATTGGCGCAGTCAACCAAA   | 260               |
| <i>paeB</i>                      | Dehydratase                 | F: GCCGGTTCAATTCGTGCTTT<br>R: TCGAGGGGCTGGAGACATAA   | 224               |
| <i>paeC</i>                      | Cyclase                     | F: ATGCAGGCTTGCTCCTGATT<br>R: ACACCTGCACATCCATCGAG   | 190               |
| <i>paeI</i>                      | Putative immunity protein   | F: ACAGCCGAATGTGTCCGAAT<br>R: TTTCCGCCCTCTCTTCAACC   | 204               |
| <i>paeT</i>                      | Transporter                 | F: TTACACTGATTTCGGCCGCT<br>R: GAGGAGCAGAGAAGACACGG   | 161               |
| <i>agrA</i>                      | Response regulator          | F: CGACGCTCTGTCTGCTTTCT<br>R: AGTGCGATGACCACGAAAAC   | 151               |
| <i>agrB</i>                      | Accessory gene regulator    | F: CCATACCCAGAGACTCAAGGC<br>R: ACCCGAAACAAATCCCTCCTC | 77                |
| <i>agrC</i>                      | Histidine kinase            | F: TGGACGAGGGGATCAGAACT<br>R: CAACTCCACGCTTCTTTGCC   | 186               |
| <i>agrD</i>                      | Autoinducing peptide        | F: CACGGTCATCTGTCTCCGAT<br>R: TTTTGTGGGGAACACCCGTT   | 238               |
| <i>paeN</i>                      | Putative acetylase          | F: TGTGGTGCCTTACGGATTGG<br>R: ACGCAAAGAGCTGAAATCGC   | 147               |
| <i>16S rRNA</i>                  | Housekeeping gene           | F: CTGCTTAGAGTGCCAGCTT<br>R: ACGCGAAGAACCTTACCAGG    | 189               |
